# Supplementary material for: Epidemiology of Sapovirus Infections in a Birth Cohort in Peru
Source: PubMed Central journal article supplement — Clin Infect Dis. 2017 Dec 22;66(12):1858–63. doi: 10.1093/cid/cix1103 (PMC5982808; doi:10.1093/cid/cix1103), 2017-12-22
Supplement: cix1103_suppl_supplementary_table_s1.pdf [file cix1103_suppl_supplementary_table_s1.pdf]

**Table S1. Sapovirus genotypes determined in 112 infections among 82 Peruvian children less than 2 years old.**

| Genotype     | Asymptomatic |        | Symptomatic |        | Undefined |        | Total |        |
|--------------|--------------|--------|-------------|--------|-----------|--------|-------|--------|
|              | n            | %      | n           | %      | n         | %      | n     | %      |
| <b>GI.1</b>  | 5            | 14.3%  | 20          | 29.0%  | 3         | 37.5   | 28    | 25.0%  |
| <b>GI.2</b>  | 1            | 2.9%   | 11          | 15.9%  | 1         | 12.5   | 13    | 11.6%  |
| <b>GI.6</b>  | 1            | 2.9%   | 6           | 8.7%   | 0         | 0      | 7     | 6.3%   |
| <b>GI.7</b>  | 3            | 8.6%   | 1           | 1.4%   | 0         | 0      | 4     | 3.6%   |
| <b>GII.1</b> | 3            | 8.6%   | 9           | 13.0%  | 1         | 12.5   | 13    | 11.6%  |
| <b>GII.2</b> | 6            | 17.1%  | 5           | 7.3%   | 0         | 0      | 11    | 9.8%   |
| <b>GII.3</b> | 1            | 2.9%   | 1           | 1.5%   | 0         | 0      | 2     | 1.8%   |
| <b>GII.4</b> | 4            | 11.4%  | 1           | 1.5%   | 0         | 0      | 5     | 4.5%   |
| <b>GII.5</b> | 6            | 17.1%  | 0           | 0.0%   | 0         | 0      | 6     | 5.4%   |
| <b>GII.6</b> | 1            | 2.9%   | 0           | 0.0%   | 1         | 12.5   | 2     | 1.8%   |
| <b>GII.7</b> | 0            | 0.0%   | 1           | 1.45%  | 0         | 0      | 1     | 0.9%   |
| <b>GII.8</b> | 2            | 5.7%   | 1           | 1.5%   | 0         | 0      | 3     | 2.7%   |
| <b>GIV.1</b> | 2            | 5.7%   | 6           | 8.7%   | 1         | 12.5   | 9     | 8.0%   |
| <b>GV.1</b>  | 0            | 0.0%   | 7           | 10.1%  | 1         | 12.5   | 8     | 7.1%   |
| <b>Total</b> | 35           | 100.0% | 69          | 100.0% | 8         | 100.0% | 112   | 100.0% |

Note: Out of 175 sapovirus infection in 82 children, genogroups of sapovirus were defined in 113 infection of 69 children. Within 113, 14 genotypes were defined in 112 infections except one sample of asymptomatic infection of GII virus, whose genotype was not defined.
