# Supplementary material for: Epidemiology of Sapovirus Infections in a Birth Cohort in Peru
Source: PubMed Central journal article supplement — Clin Infect Dis. 2017 Dec 22;66(12):1858–63. doi: 10.1093/cid/cix1103 (PMC5982808; doi:10.1093/cid/cix1103), 2017-12-22
Supplement: cix1103_suppl_supplementary_table_s2.pdf [file cix1103_suppl_supplementary_table_s2.pdf]

**Table S2. Characteristics and genotypes of repeated sapovirus infections in 59 Peruvian birth cohort children < 2 years old**

| <b>Child</b> | <b>Date</b> | <b>Age</b> | <b>Genotype</b> | <b>Symptomatic Infection</b> | <b>History of norovirus infection</b> |
|--------------|-------------|------------|-----------------|------------------------------|---------------------------------------|
| <b>PX020</b> | 11/27/2007  | 7m         | N.A.*           | UD†                          | No                                    |
|              | 2/1/2009    | 1y 9m      | N.A.            | Yes                          | Yes                                   |
| <b>PX026</b> | 1/28/2008   | 8m         | GII.4           | No                           | Yes                                   |
|              | 3/16/2009   | 1y 10m     | N.A.            | Yes                          | Yes                                   |
|              | 5/10/2009   | 1y 11m     | GII.5           | No                           | Yes                                   |
| <b>PX029</b> | 6/16/2008   | 1y         | GI.1            | UD                           | Yes                                   |
|              | 8/20/2008   | 1y 2m      | GI.1            | Yes                          | Yes                                   |
| <b>PX030</b> | 11/26/2007  | 7m         | N.A.            | No                           | No                                    |
|              | 2/28/2009   | 1y 10m     | N.A.            | No                           | No                                    |
| <b>PX033</b> | 4/27/2008   | 11m        | GIV.1           | Yes                          | No                                    |
|              | 3/25/2009   | 1y 10m     | N.A.            | No                           | Yes                                   |
|              | 4/28/2009   | 1y 11m     | GI.2            | Yes                          | Yes                                   |
| <b>PX046</b> | 7/12/2008   | 1y 1m      | GI.6            | Yes                          | Yes                                   |
|              | 11/14/2008  | 1y 5m      | N.A.            | Yes                          | Yes                                   |
|              | 4/22/2009   | 1y 10m     | GV.1            | Yes                          | Yes                                   |
| <b>PX049</b> | 4/16/2008   | 11m        | GI.2            | Yes                          | Yes                                   |
|              | 3/13/2009   | 1y 10m     | N.A.            | No                           | Yes                                   |
| <b>PX051</b> | 6/3/2008    | 1y         | GI.7            | No                           | Yes                                   |
|              | 3/9/2009    | 1y 9m      | N.A.            | UD                           | Yes                                   |
| <b>PX053</b> | 4/19/2008   | 10m        | GII.4           | No                           | Yes                                   |
|              | 1/15/2009   | 1y 7m      | N.A.            | No                           | Yes                                   |
|              | 2/15/2009   | 1y 8m      | GV.1            | Yes                          | Yes                                   |
| <b>PX054</b> | 11/14/2007  | 5m         | GI.1            | No                           | No                                    |
|              | 1/16/2009   | 1y 7m      | GI.6            | Yes                          | Yes                                   |
| <b>PX057</b> | 11/18/2007  | 4m         | N.A.            | No                           | No                                    |
|              | 6/9/2009    | 1y 10m     | N.A.            | No                           | Yes                                   |
| <b>PX059</b> | 1/27/2008   | 7m         | GII.6           | No                           | No                                    |
|              | 1/28/2009   | 1y 7m      | N.A.            | Yes                          | Yes                                   |
|              | 5/5/2009    | 1y 10m     | GII.5           | No                           | Yes                                   |
| <b>PX067</b> | 5/12/2008   | 11m        | GI.1            | Yes                          | Yes                                   |
|              | 9/1/2008    | 1y 2m      | GV.1            | Yes                          | Yes                                   |
|              | 3/11/2009   | 1y 9m      | N.A.            | Yes                          | Yes                                   |
|              | 5/24/2009   | 1y 11m     | N.A.            | Yes                          | Yes                                   |
| <b>PX076</b> | 8/4/2008    | 1y         | GV.1            | Yes                          | Yes                                   |
|              | 5/8/2009    | 1y 9m      | N.A.            | Yes                          | Yes                                   |
|              | 5/31/2009   | 1y 10m     | GIV.1           | Yes                          | Yes                                   |

|              |           |        |       |     |     |
|--------------|-----------|--------|-------|-----|-----|
| <b>PX081</b> | 8/8/2007  | <1m    | N.A.  | No  | No  |
|              | 2/3/2009  | 1y 6m  | GI.1  | Yes | Yes |
| <b>PX087</b> | 2/23/2009 | 1y 8m  | N.A.  | No  | Yes |
|              | 3/18/2009 | 1y 8m  | GI.1  | Yes | Yes |
|              | 5/18/2009 | 1y 10m | GIV.1 | No  | Yes |
| <b>PX100</b> | 1/25/2009 | 1y 7m  | N.A.  | No  | Yes |
|              | 5/5/2009  | 1y 10m | N.A.  | No  | Yes |
| <b>PX101</b> | 1/27/2008 | 5m     | GII.7 | Yes | No  |
|              | 5/7/2008  | 8m     | GI.7  | No  | Yes |
|              | 6/2/2008  | 9m     | N.A.  | No  | Yes |
|              | 1/26/2009 | 1y 5m  | N.A.  | Yes | Yes |
| <b>PX115</b> | 1/3/2008  | 4m     | GII.4 | No  | No  |
|              | 2/22/2008 | 6m     | N.A.  | Yes | No  |
| <b>PX116</b> | 12/9/2007 | 4m     | GI.1  | Yes | Yes |
|              | 7/22/2008 | 1y     | GII.6 | UD  | Yes |
| <b>PX120</b> | 1/26/2009 | 1y 5m  | N.A.  | No  | Yes |
|              | 4/15/2009 | 1y 7m  | GI.1  | Yes | Yes |
| <b>PX133</b> | 10/5/2008 | 1y     | N.A.  | Yes | No  |
|              | 1/9/2009  | 1y 4m  | GI.1  | Yes | Yes |
|              | 3/8/2009  | 1y 5m  | GI.7  | Yes | Yes |
|              | 3/23/2009 | 1y 6m  | GI.1  | No  | Yes |
| <b>PX135</b> | 3/16/2008 | 6m     | N.A.  | Yes | No  |
|              | 1/23/2009 | 1y 4m  | N.A.  | No  | Yes |
|              | 6/19/2009 | 1y 9m  | N.A.  | Yes | Yes |
| <b>PX137</b> | 3/30/2009 | 1y 6m  | N.A.  | Yes | Yes |
|              | 4/24/2009 | 1y 6m  | N.A.  | Yes | Yes |
|              | 6/1/2009  | 1y 8m  | GI.6  | Yes | Yes |
| <b>PX139</b> | 5/12/2008 | 7m     | N.A.  | No  | No  |
|              | 7/15/2009 | 1y 9m  | GII.1 | Yes | Yes |
| <b>PX144</b> | 5/26/2008 | 7m     | GI.1  | UD  | No  |
|              | 1/23/2009 | 1y 3m  | N.A.  | Yes | Yes |
|              | 4/1/2009  | 1y 5m  | GII.1 | Yes | Yes |
| <b>PX161</b> | 1/19/2009 | 1y 3m  | GII.1 | Yes | Yes |
|              | 2/3/2009  | 1y 3m  | GI.6  | Yes | Yes |
|              | 4/25/2009 | 1y 6m  | GI.1  | Yes | Yes |
| <b>PX168</b> | 5/25/2009 | 1y 7m  | GI.2  | Yes | Yes |
|              | 8/5/2009  | 1y 9m  | GI.6  | No  | Yes |
| <b>PX169</b> | 6/8/2008  | 8m     | GII.2 | No  | Yes |
|              | 3/9/2009  | 1y 5m  | N.A.  | No  | Yes |
|              | 6/1/2009  | 1y 7m  | GII.1 | No  | Yes |
| <b>PX171</b> | 3/25/2009 | 1y 4m  | GI.1  | Yes | Yes |
|              | 5/6/2009  | 1y 6m  | GI.1  | No  | Yes |

|              |            |        |       |     |     |
|--------------|------------|--------|-------|-----|-----|
| <b>PX175</b> | 2/12/2009  | 1y 3m  | GI.1  | Yes | Yes |
|              | 5/5/2009   | 1y 5m  | GII.2 | Yes | Yes |
| <b>PX183</b> | 3/1/2009   | 1y 3m  | GII.1 | Yes | No  |
|              | 5/27/2009  | 1y 6m  | GI.1  | Yes | Yes |
| <b>PX186</b> | 4/2/2008   | 3m     | GV.1  | Yes | Yes |
|              | 5/13/2009  | 1y 5m  | GII.2 | No  | Yes |
|              | 6/8/2009   | 1y 5m  | GIV.1 | Yes | Yes |
| <b>PX188</b> | 2/14/2009  | 1y 1m  | GI.1  | Yes | Yes |
|              | 4/29/2009  | 1y 4m  | GII.2 | No  | Yes |
| <b>PX189</b> | 1/1/2009   | 1y     | GI.1  | Yes | Yes |
|              | 3/25/2009  | 1y 3m  | N.A.  | Yes | Yes |
| <b>PX190</b> | 7/1/2009   | 1y 6m  | N.A.  | No  | Yes |
|              | 7/21/2009  | 1y 7m  | GI.1  | No  | Yes |
| <b>PX194</b> | 3/22/2009  | 1y 3m  | GI.1  | Yes | Yes |
|              | 4/20/2009  | 1y 4m  | N.A.  | No  | Yes |
|              | 5/10/2009  | 1y 5m  | GI.2  | UD  | Yes |
| <b>PX205</b> | 3/13/2009  | 1y 1m  | GI.1  | Yes | Yes |
|              | 5/26/2009  | 1y 3m  | GI.2  | Yes | Yes |
| <b>PX216</b> | 5/28/2009  | 1y 3m  | GI.1  | Yes | Yes |
|              | 6/5/2009   | 1y 3m  | GI.6  | Yes | Yes |
|              | 6/23/2009  | 1y 4m  | GIV.1 | Yes | Yes |
|              | 10/27/2009 | 1y 8m  | GV.1  | Yes | Yes |
|              | 11/11/2009 | 1y 8m  | GI.2  | Yes | Yes |
| <b>PX224</b> | 3/10/2009  | 1y 1m  | N.A.  | Yes | No  |
|              | 7/14/2009  | 1y 5m  | GII.5 | No  | Yes |
|              | 10/5/2009  | 1y 7m  | GII.2 | No  | Yes |
| <b>PX233</b> | 11/19/2008 | 8m     | GII.8 | No  | Yes |
|              | 3/11/2009  | 1y     | GI.1  | No  | Yes |
| <b>PX236</b> | 1/15/2009  | 10m    | GII.N | No  | Yes |
|              | 3/28/2009  | 1y 1m  | N.A.  | No  | Yes |
|              | 1/4/2010   | 1y 10m | GII.8 | No  | Yes |
| <b>PX237</b> | 3/16/2009  | 1y     | N.A.  | No  | Yes |
|              | 9/24/2009  | 1y 6m  | GII.8 | Yes | Yes |
| <b>PX239</b> | 4/8/2008   | 1m     | GII.1 | No  | No  |
|              | 8/1/2009   | 1y 4m  | GII.3 | Yes | Yes |
| <b>PX246</b> | 7/12/2008  | 4m     | GI.6  | Yes | No  |
|              | 5/4/2009   | 1y 2m  | GI.2  | Yes | Yes |
| <b>PX257</b> | 5/28/2008  | 2m     | N.A.  | Yes | No  |
|              | 1/28/2009  | 10m    | N.A.  | No  | Yes |
| <b>PX258</b> | 3/14/2009  | 11m    | GII.1 | Yes | Yes |
|              | 6/14/2009  | 1y 2m  | GI.2  | Yes | Yes |

|              |            |        |       |     |     |
|--------------|------------|--------|-------|-----|-----|
|              | 8/18/2009  | 1y 4m  | GV.1  | UD  | Yes |
| <b>PX259</b> | 3/29/2009  | 1y     | N.A.  | No  | Yes |
|              | 1/1/2010   | 1y 9m  | N.A.  | Yes | Yes |
| <b>PX260</b> | 3/16/2009  | 1y     | N.A.  | Yes | No  |
|              | 9/21/2009  | 1y 6m  | GII.2 | No  | No  |
| <b>PX267</b> | 3/22/2009  | 11m    | GII.2 | Yes | Yes |
|              | 10/19/2009 | 1y 6m  | N.A.  | Yes | Yes |
| <b>PX268</b> | 4/12/2009  | 1y     | GV.1  | Yes | Yes |
|              | 5/19/2009  | 1y 1m  | GI.2  | Yes | Yes |
| <b>PX269</b> | 4/23/2009  | 1y     | GII.1 | Yes | Yes |
|              | 3/4/2010   | 1y 10m | N.A.  | Yes | Yes |
| <b>PX270</b> | 3/24/2009  | 11m    | N.A.  | Yes | Yes |
|              | 5/1/2009   | 1y     | GII.1 | No  | Yes |
| <b>PX272</b> | 4/16/2009  | 1y     | GII.2 | No  | Yes |
|              | 7/1/2009   | 1y 2m  | GI.2  | No  | Yes |
|              | 7/12/2009  | 1y 3m  | GII.4 | Yes | Yes |
| <b>PX274</b> | 4/20/2009  | 9m     | GI.2  | Yes | Yes |
|              | 7/13/2009  | 1y     | GIV.1 | UD  | Yes |
|              | 4/4/2010   | 1y 9m  | N.A.  | No  | Yes |
| <b>PX285</b> | 3/8/2009   | 7m     | GII.1 | Yes | Yes |
|              | 5/5/2009   | 9m     | N.A.  | No  | Yes |
|              | 5/4/2010   | 1y 9m  | GII.5 | No  | Yes |
| <b>PX287</b> | 3/17/2009  | 5m     | N.A.  | No  | Yes |
|              | 6/13/2009  | 7m     | GIV.1 | Yes | Yes |
|              | 9/17/2009  | 11m    | GI.1  | Yes | Yes |
|              | 12/15/2009 | 1y 2m  | GII.3 | No  | Yes |
|              | 1/5/2010   | 1y 2m  | GII.5 | No  | Yes |
|              | 1/12/2010  | 1y 2m  | GII.2 | Yes | Yes |
| <b>PX291</b> | 3/18/2009  | 4m     | N.A.  | Yes | No  |
|              | 3/14/2010  | 1y 4m  | GI.7  | No  | Yes |
| <b>PX298</b> | 3/9/2009   | <1m    | N.A.  | No  | No  |
|              | 5/18/2009  | 3m     | N.A.  | No  | No  |
|              | 9/6/2010   | 1y 6m  | GII.2 | Yes | Yes |

\*N.A.: Genotype not available

† UD: “Undefined” infection occurred when sapovirus was detected in a stool specimen more than seven days after diarrhea onset but less than 14 days.
