# Supplementary material for: Epidemiology of Sapovirus Infections in a Birth Cohort in Peru
Source: PubMed Central journal article supplement — Clin Infect Dis. 2017 Dec 22;66(12):1858–63. doi: 10.1093/cid/cix1103 (PMC5982808; doi:10.1093/cid/cix1103), 2017-12-22
Supplement: cix1103_suppl_supplementary_table_s3.pdf [file cix1103_suppl_supplementary_table_s3.pdf]

**Table S3. Comparison of background characteristics between cohort children selected for sapovirus study (n = 100) and not selected (n = 191).**

|                                                                   | Selected     |      | Not selected |      | <i>p</i> |
|-------------------------------------------------------------------|--------------|------|--------------|------|----------|
|                                                                   | n = 100      |      | N = 191      |      |          |
| Mean birth weight ± SD (g)                                        | 3352 ± 494   |      | 3295 ± 438   |      | 0.316    |
| Median Mother's age, [25 <sup>th</sup> -75 <sup>th</sup> % range] | 30 [24 - 36] |      | 28 [23 - 32] |      | 0.176    |
|                                                                   | n            | %    | n            | %    |          |
| Gender of the child                                               |              |      |              |      |          |
| Male                                                              | 55           | 47.1 | 88           | 50.3 |          |
| Female                                                            | 45           | 52.9 | 103          | 50.8 | 0.148    |
| Mother's education                                                |              |      |              |      |          |
| No schooling                                                      | 5            | 5.1  | 9            | 4.7  |          |
| Primary                                                           | 27           | 27.6 | 47           | 24.6 |          |
| Secondary                                                         | 54           | 55.1 | 101          | 52.9 |          |
| > Secondary                                                       | 12           | 12.2 | 34           | 17.8 | 0.670    |
| Exclusive breast fed in 3-6 months old                            |              |      |              |      |          |
| ≥ 50% of days                                                     | 60           | 60.0 | 99           | 55.0 |          |
| < 50% of days                                                     | 40           | 40.0 | 81           | 45.0 | 0.418    |
| Water source                                                      |              |      |              |      |          |
| In-door connection for 24hrs                                      | 86           | 86.0 | 173          | 90.6 |          |
| In-door connection < 24hrs                                        | 0            | 0.0  | 2            | 1.1  |          |
| Out-door connection                                               | 3            | 3.0  | 1            | 0.5  |          |
| Sharing with others                                               | 5            | 5.0  | 5            | 2.6  |          |
| Public connection                                                 | 6            | 6.0  | 10           | 5.3  | 0.259    |
| Cost for water/month                                              |              |      |              |      |          |
| 11-20 USD                                                         | 92           | 92.0 | 169          | 89.0 |          |
| 21-30 USD                                                         | 7            | 7.0  | 19           | 10.0 |          |
| 31-40 USD                                                         | 1            | 1.0  | 2            | 1.0  | 0.695    |

|                            |             |    |      |     |      |       |
|----------------------------|-------------|----|------|-----|------|-------|
| Waste                      |             |    |      |     |      |       |
| In-door flash toilet       |             | 86 | 86.0 | 178 | 93.2 |       |
| Out-door flash toilet      |             | 6  | 6.0  | 4   | 2.1  |       |
| Latrine (personal)         |             | 1  | 1.0  | 2   | 1.1  |       |
| Latrine (shared)           |             | 0  | 0.0  | 1   | 0.5  |       |
| Hole-toilet                |             | 7  | 7.0  | 6   | 3.1  | 0.199 |
| Having electricity         |             |    |      |     |      |       |
|                            | Yes         | 97 | 97.0 | 189 | 99.0 |       |
|                            | No          | 3  | 3.0  | 2   | 1.0  | 0.223 |
| Having refrigerator        |             |    |      |     |      |       |
|                            | Yes         | 46 | 46.0 | 94  | 49.2 |       |
|                            | No          | 54 | 54.0 | 97  | 50.8 | 0.820 |
| Having animal in household |             |    |      |     |      |       |
|                            | Yes         | 72 | 72.0 | 122 | 63.9 |       |
|                            | No          | 28 | 28.0 | 69  | 36.1 | 0.163 |
| Household income (Monthly) |             |    |      |     |      |       |
|                            | 51-150 USD  | 20 | 20.4 | 43  | 22.9 |       |
|                            | 151-250 USD | 66 | 67.4 | 114 | 60.6 |       |
|                            | ≥ 251USD    | 12 | 12.2 | 31  | 16.5 | 0.494 |

---
